# Supplementary material for: Down-Regulation of Cannabinoid Type 1 (CB1) Receptor and its Downstream Signaling Pathways in Metastatic Colorectal Cancer
Source: PubMed Central journal article supplement (PMC6562552; doi:10.3390/cancers11050708), 2019-05-22
Supplement: cancers-11-00708-s001.pdf [file cancers-11-00708-s001.pdf]

Supplementary Material

## Down-Regulation of Cannabinoid Type 1 (CB1) Receptor and its Downstream Signaling Pathways in Metastatic Colorectal Cancer

Valeria Tutino, Maria Gabriella Caruso, Valentina De Nunzio, Dionigi Lorusso, Nicola Veronese, Isabella Gigante, Maria Notarnicola and Gianluigi Giannelli

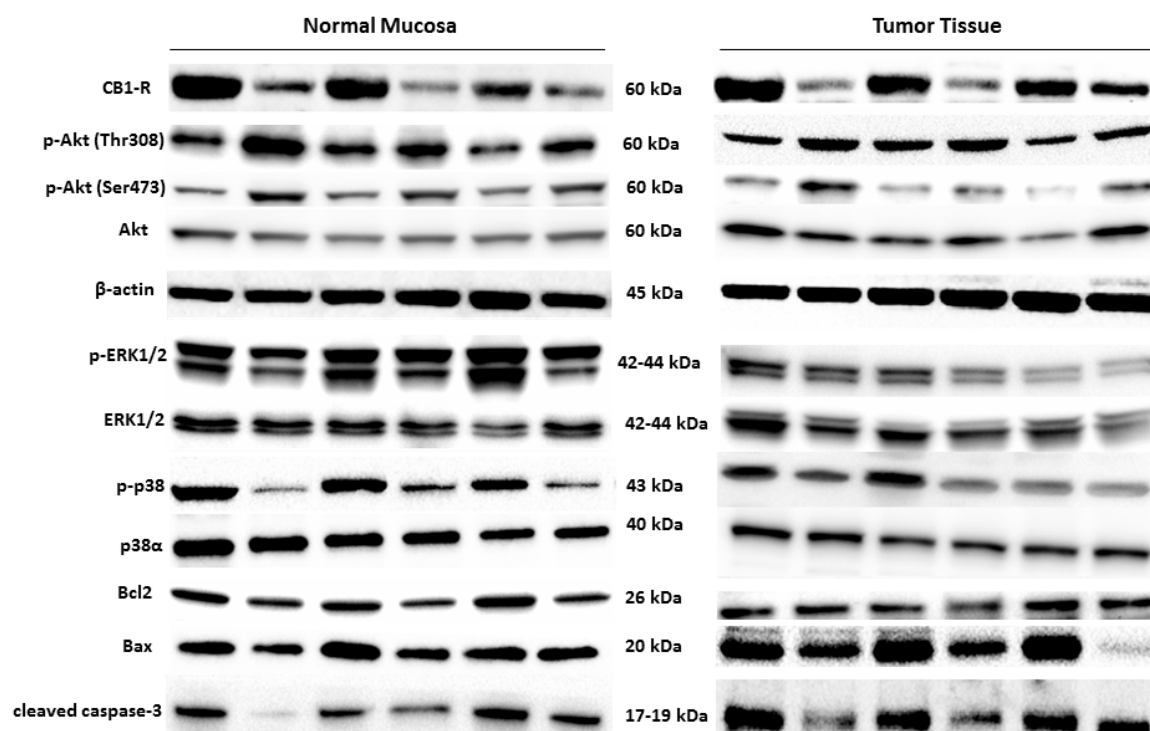

**Figure S1.** All Western blot figures include a dot plots graph showing the densitometry values of each sample (band) normalized to β-actin value.

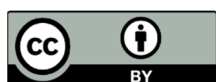

© 2019 by the authors. Licensee MDPI, Basel, Switzerland. This article is an open access article distributed under the terms and conditions of the Creative Commons Attribution (CC BY) license (<http://creativecommons.org/licenses/by/4.0/>).
